# Supplementary material for: Phase II trial of Modified Vaccinia Ankara (MVA) virus expressing 5T4 and high dose Interleukin-2 (IL-2) in patients with metastatic renal cell carcinoma
Source: J Transl Med. 2009 Jan 7;7:2. doi: 10.1186/1479-5876-7-2 (PMC2631474; doi:10.1186/1479-5876-7-2)
Supplement: Additional file 1 — MVA- and 5T4- specific antibody responses. (A) MVA-specific antibody titers, (B) 5T4-specific antibody titers. The data provided antibody titers specific for MVA- and 5T4- antibodies. [file 1479-5876-7-2-S1.pdf]

### Additional file 1. MVA- and 5T4- specific antibody responses

### a. MVA-specific antibody titers

[illegible]

### Additional file 1. MVA- and 5T4- specific antibody responses

### b. 5T4-specific antibody titers

[illegible]
